# Supplementary material for: Exploring metabolic interaction between Ophiostoma novo-ulmi and Geosmithia spp
Source: Research Square preprint supplement (doi:10.21203/rs.3.rs-8842177/v1), 2026-02-16
Supplement: Supplementary file 1 [file 0e51c6c11794271724f266de.docx]

Exploring metabolitic interaction between *Ophiostoma novo-ulmi* and *Geosmithia* spp.

A.L. Pepori1, H. Berto1,2, A. Gionni1, N. Luchi1, F. Pecori1, A. Santini1

**Supplementary material**

| Fungal species | isolate | Geographic orgin | | Reference |
| --- | --- | --- | --- | --- |
| *Ophiostoma novo-ulmi* NAN | H172 | Keene, New Hampshire, USA | [23] | |
| 182E | La Favorita (PA), Italy | [24] | |
| OPH123 | Morichella (MC), Italy | CNR IPSP collection | |
| OPH32A | Monterotondo M.mo (GR), Italy | CNR IPSP collection | |
| *Ophiostoma novo-ulmi* EAN | CTK11 | Chachkam Forest, Iran | [24] | |
| R64 | Hermeus , Romania | [24] | |
| H327 | Brezno-Nizke, Tatry, Bratislava, Slovakia | [23] | |
| H328 | Gottschalf Charkov, Russia | [25] | |
| *Geosmithia pumila* | CNR39 | Vilegia, Central Bohemia, Czech Rep. | [2] | |
| IVV7 | Vibo Valentia (RC), Italy | [26] | |
| *G. funiculosa* | CNR102 | Libis, Central Bohemia, Czech Rep. | [2] | |
| CNR48 | Vilegia, Central Bohemia, Czech Rep. | [2] | |
| CNR31 | Vilegia, Central Bohemia, Czech Rep. | [2] | |
| *G. langdonii* | CNR105 | Hostenice, Usti nad Labem, Czech Rep. | [2] | |
| CNR26 | Vilegia, Central Bohemia, Czech Rep. | [2] | |
| *G. omnicola* | CNR8 | Vilegia, Central Bohemia, Czech Rep. | [2] | |
| CNR32 | Stredokluky, Central Bohemia, Czech Rep. | [2] | |
| *G. ulmacea* | CNR23 | Stredokluky, Central Bohemia, Czech Rep. | [2] | |
| *G. flava* | CNR120 | Marsovice, Czech Rep. | [2] | |
| *G. putterillii* | CCF3342 | North Bohemia, Louny, Czech Rep. | [27] | |

Table S1. *Ophiostoma novo ulmi* and *Geosmithia* spp. fungi strains used in this work.

|  | Value |
| --- | --- |
| Total substrates analyzed | 95 |
| Mean synergy ± SD | 9.49 ± 35.96 |
| Synergy range | -82.41 to +90.39 |
| Positive synergy substrates (n, %) | 48 (50.5%) |
| Negative synergy substrates (n, %) | 47 (49.5%) |
| Mean positive synergy | +38.10 |
| Mean negative synergy | -19.74 |
| Strong synergy (>40) (n, %) | 24 (25.8%) |
| Moderate synergy (10-40) (n, %) | 12 (12.9%) |
| Weak synergy (0-10) (n, %) | 11 (11.8%) |
| Weak antagonism (-10 to 0) (n, %) | 12 (12.9%) |
| Strong antagonism (<-10) (n, %) | 34 (36.6%) |

Table S2. Summary of synergistic analysis of 95 substrates comparing the three treatments (*O. novo-ulmi* (monoculture), *O. novo-ulmi* & *G. pumila* (dual culture), and *G. pumila* (monoculture)).

|  | Group | *G. pumila* | *O. novo-ulmi* | *G. pumila/O. novo-ulmi* |
| --- | --- | --- | --- | --- |
| 1 | Amines/amides | 144a±72.97 | 72b±50.52 | 123ab±65.99 |
| 2 | Amino acids | 199a±17.92 | 136c±60.95 | 172b±13.21 |
| 3 | Carbohydrates | 143a±74.33 | 119b±69.2 | 136ab±59.65 |
| 4 | Carboxylic acids | 163a±45.36 | 68b±72.49 | 144a±32.47 |
| 5 | Miscellaneous | 144a±68.96 | 73b±79.38 | 124a±45.97 |
| 6 | Polymers | 109a±71.95 | 94a±80.71 | 90a±79.3 |

Table S3. The OD values of substrate groups for each treatment were used to test the statistical difference among groups. On the mean value was added the standard deviation value. Treatment means with different letters are significantly different inside the same group (Tukey Honest Significant Difference (HSD) post-hoc test, p < 0.05; n =3).
